# Supplementary material
Source: Springer Nature journal article supplement (https://www.springermedizin.de/resource/supplementary/12885_2013_4118_MOESM5_ESM.pdf/9465426)

**A**

Control

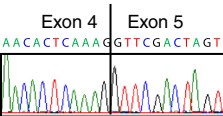*RAD51C* c.706-2A>G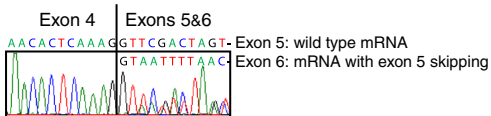**B**

Control

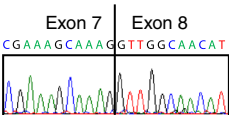*RAD51C* c.1026+5\_1026+7del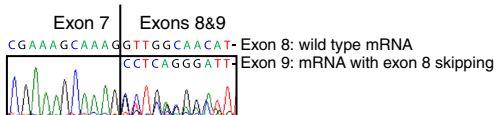

Supplement: MOESM5 [file 9465426]
